# Supplementary material for: Assessing the quality of medical death certification: a case study of concordance between national statistics and results from a medical record review in a regional hospital in the Philippines
Source: Popul Health Metr. 2018 Dec 29;16:23. doi: 10.1186/s12963-018-0178-0 (PMC6311069; doi:10.1186/s12963-018-0178-0)
Supplement: Supplementary file 3 — Misclassification matrix table for all adult deaths. Misclassification matrix for gold standard 1 and 2 deaths that compares the underlying cause of death assigned by study physicians with the underlying cause of death assigned by the Philippine Statistics Authority. (XLSX 19 kb) [file 12963_2018_178_MOESM3_ESM.xlsx]

## Sheet: confusion_matrix_all
		Medical Record Review
Philippine Statistics Authority	Cause	Acute Myocardial Infarction	Breast Cancer	Cirrhosis	Colorectal Cancer	COPD	Diabetes	Diarrhea/Dysentery	Falls	Homicide	Leukemia/Lymphomas	Lung Cancer	Maternal	Other Cancers	Other Cardiovascular Diseases	Other Infectious Diseases	Other Injuries	Other NCDS	Pneumonia	Pulmonary tuberculosis	Renal Disease	Road Traffic	Stroke	Total	CSMF	Agreement	% Agreement
	Acute Myocardial Infarction	31	0	0	0	0	2	0	1	0	0	0	0	0	1	0	0	1	1	0	0	1	5	43	0.0408745	31	0.72093
	Breast Cancer	0	7	0	0	0	1	0	0	0	0	0	0	0	0	0	0	0	1	0	0	0	0	9	0.00855513	7	0.777778
	Cirrhosis	0	0	17	0	0	0	0	0	0	0	0	0	0	0	0	0	4	0	1	0	0	0	22	0.0209125	17	0.772727
	Colorectal Cancer	0	0	0	9	0	0	0	0	0	0	0	0	0	0	0	0	1	0	0	0	0	0	10	0.0095057	9	0.9
	COPD	0	0	0	0	3	0	0	0	0	0	0	0	0	0	1	0	0	4	1	0	0	0	9	0.00855513	3	0.333333
	Diabetes	3	0	0	0	0	36	0	0	0	0	0	0	0	2	3	0	2	5	1	1	0	8	61	0.0579848	36	0.590164
	Diarrhea/Dysentery	0	0	0	0	0	0	3	0	0	0	0	0	0	0	0	0	3	0	0	0	0	0	6	0.00570342	3	0.5
	Falls	0	0	0	0	0	0	0	14	0	0	0	0	0	0	0	0	1	0	0	0	0	1	16	0.0152091	14	0.875
	Homicide	0	0	0	0	0	0	0	0	24	0	0	0	0	0	0	1	0	0	0	0	1	0	26	0.0247148	24	0.923077
	Leukemia/Lymphomas	0	0	0	0	0	0	0	0	0	6	0	0	0	0	0	0	0	0	2	0	0	0	8	0.00760456	6	0.75
	Lung Cancer	0	0	0	0	0	0	0	1	0	0	7	0	0	0	0	0	0	4	2	0	0	0	14	0.013308	7	0.5
	Maternal	0	0	0	0	0	0	0	0	0	0	0	9	1	0	0	0	0	0	0	0	0	0	10	0.0095057	9	0.9
	Other Cancers	1	0	1	3	0	0	0	0	0	0	0	0	31	0	1	0	1	2	1	0	1	0	42	0.039924	31	0.738095
	Other Cardiovascular Diseases	6	0	0	0	0	2	0	2	0	0	0	0	0	34	0	0	4	4	0	1	0	13	66	0.0627376	34	0.515152
	Other Infectious Diseases	0	0	2	0	0	0	1	0	0	0	0	1	1	1	41	0	8	6	0	2	0	4	67	0.0636882	41	0.61194
	Other Injuries	0	0	0	0	0	0	0	1	2	0	0	0	0	0	1	16	0	0	0	0	8	0	28	0.026616	16	0.571429
	Other NCDS	2	0	1	1	0	3	2	0	0	1	0	1	1	4	16	2	90	17	1	13	1	11	167	0.158745	90	0.538922
	Pneumonia	3	0	0	0	0	1	0	0	0	0	0	0	1	1	5	0	4	37	4	1	0	11	68	0.0646388	37	0.544118
	Pulmonary tuberculosis	0	0	0	0	1	1	0	0	0	0	0	0	1	2	5	0	3	12	27	1	0	0	53	0.0503802	27	0.509434
	Renal Disease	1	0	2	0	0	4	1	0	0	0	0	0	0	0	6	0	7	2	0	29	0	0	52	0.0494297	29	0.557692
	Road Traffic	0	0	0	0	0	0	0	0	0	0	0	0	0	0	0	0	0	0	0	0	75	0	75	0.0712928	75	1
	Stroke	1	0	0	0	0	0	0	1	0	0	0	1	0	1	1	0	3	9	0	0	1	182	200	0.190114	182	0.91
	Total	48	7	23	13	4	50	7	20	26	7	7	12	36	46	80	19	132	104	40	48	88	235	1052	1	728	0.692015
	CSMF	0.0456274	0.00665399	0.0218631	0.0123574	0.00380228	0.0475285	0.00665399	0.0190114	0.0247148	0.00665399	0.00665399	0.0114068	0.0342205	0.0437262	0.0760456	0.0180608	0.125475	0.0988593	0.0380228	0.0456274	0.0836502	0.223384	1
	Agreement	31	7	17	9	3	36	3	14	24	6	7	9	31	34	41	16	90	37	27	29	75	182	728
	% Agreement	0.645833	1	0.73913	0.692308	0.75	0.72	0.428571	0.7	0.923077	0.857143	1	0.75	0.861111	0.73913	0.5125	0.842105	0.681818	0.355769	0.675	0.604167	0.852273	0.774468	0.692015
