# Supplementary material for: Assessing the quality of medical death certification: a case study of concordance between national statistics and results from a medical record review in a regional hospital in the Philippines
Source: Popul Health Metr. 2018 Dec 29;16:23. doi: 10.1186/s12963-018-0178-0 (PMC6311069; doi:10.1186/s12963-018-0178-0)
Supplement: Supplementary file 4 — Misclassification matrix for adult gold high quality diagnoses. Misclassification table for gold standard 1 and 2 deaths that compares the underlying cause of death assigned by study physicians with the underlying cause of death assigned by the Philippine Statistics Authority. (XLSX 15 kb) [file 12963_2018_178_MOESM4_ESM.xlsx]

## Sheet: confusion_matrix_high
		Medical Record Review
Philippine Statistics Authority	Cause	Acute Myocardial Infarction	Breast Cancer	Cirrhosis	Colorectal Cancer	COPD	Diabetes	Diarrhea/Dysentery	Falls	Homicide	Leukemia/Lymphomas	Lung Cancer	Maternal	Other Cancers	Other Cardiovascular Diseases	Other Infectious Diseases	Other Injuries	Other NCDS	Pneumonia	Pulmonary tuberculosis	Renal disease	Road Traffic	Stroke	Total	CSMF	Agreement	% Agreement
	Acute Myocardial Infarction	22	0	0	0	0	2	0	1	0	0	0	0	0	0	0	0	0	1	0	0	1	5	32	0.0407643	22	0.6875
	Breast Cancer	0	7	0	0	0	0	0	0	0	0	0	0	0	0	0	0	0	1	0	0	0	0	8	0.0101911	7	0.875
	Cirrhosis	0	0	13	0	0	0	0	0	0	0	0	0	0	0	0	0	1	0	1	0	0	0	15	0.0191083	13	0.866667
	Colorectal Cancer	0	0	0	9	0	0	0	0	0	0	0	0	0	0	0	0	0	0	0	0	0	0	9	0.011465	9	1
	COPD	0	0	0	0	2	0	0	0	0	0	0	0	0	0	0	0	0	4	0	0	0	0	6	0.00764331	2	0.333333
	Diabetes	3	0	0	0	0	26	0	0	0	0	0	0	0	1	1	0	1	4	1	1	0	8	46	0.0585987	26	0.565217
	Diarrhea/Dysentery	0	0	0	0	0	0	3	0	0	0	0	0	0	0	0	0	1	0	0	0	0	0	4	0.00509554	3	0.75
	Falls	0	0	0	0	0	0	0	12	0	0	0	0	0	0	0	0	0	0	0	0	0	1	13	0.0165605	12	0.923077
	Homicide	0	0	0	0	0	0	0	0	23	0	0	0	0	0	0	1	0	0	0	0	1	0	25	0.0318471	23	0.92
	Leukemia/Lymphomas	0	0	0	0	0	0	0	0	0	6	0	0	0	0	0	0	0	0	2	0	0	0	8	0.0101911	6	0.75
	Lung Cancer	0	0	0	0	0	0	0	1	0	0	3	0	0	0	0	0	0	4	1	0	0	0	9	0.011465	3	0.333333
	Maternal	0	0	0	0	0	0	0	0	0	0	0	6	1	0	0	0	0	0	0	0	0	0	7	0.0089172	6	0.857143
	Other Cancers	1	0	0	2	0	0	0	0	0	0	0	0	21	0	0	0	1	2	1	0	1	0	29	0.0369427	21	0.724138
	Other Cardiovascular Diseases	5	0	0	0	0	1	0	2	0	0	0	0	0	21	0	0	1	4	0	1	0	13	48	0.0611465	21	0.4375
	Other Infectious Diseases	0	0	1	0	0	0	0	0	0	0	0	1	1	0	19	0	2	6	0	1	0	3	34	0.0433121	19	0.558824
	Other Injuries	0	0	0	0	0	0	0	1	2	0	0	0	0	0	1	12	0	0	0	0	8	0	24	0.0305732	12	0.5
	Other NCDS	2	0	0	1	0	2	2	0	0	1	0	1	0	2	9	1	44	16	0	8	1	7	97	0.123567	44	0.453608
	Pneumonia	3	0	0	0	0	0	0	0	0	0	0	0	0	0	3	0	2	32	3	0	0	10	53	0.0675159	32	0.603774
	Pulmonary tuberculosis	0	0	0	0	1	1	0	0	0	0	0	0	1	2	3	0	0	11	13	1	0	0	33	0.0420382	13	0.393939
	Renal disease	1	0	2	0	0	3	1	0	0	0	0	0	0	0	3	0	2	1	0	21	0	0	34	0.0433121	21	0.617647
	Road Traffic	0	0	0	0	0	0	0	0	0	0	0	0	0	0	0	0	0	0	0	0	74	0	74	0.0942675	74	1
	Stroke	1	0	0	0	0	0	0	1	0	0	0	1	0	0	0	0	1	7	0	0	1	165	177	0.225478	165	0.932203
	Total	38	7	16	12	3	35	6	18	25	7	3	9	24	26	39	14	56	93	22	33	87	212	785	1	554	0.705732
	CSMF	0.0484076	0.0089172	0.0203822	0.0152866	0.00382166	0.044586	0.00764331	0.0229299	0.0318471	0.0089172	0.00382166	0.011465	0.0305732	0.033121	0.0496815	0.0178344	0.0713376	0.118471	0.0280255	0.0420382	0.110828	0.270064	1
	Agreement	22	7	13	9	2	26	3	12	23	6	3	6	21	21	19	12	44	32	13	21	74	165	554
	% Agreement	0.578947	1	0.8125	0.75	0.666667	0.742857	0.5	0.666667	0.92	0.857143	1	0.666667	0.875	0.807692	0.487179	0.857143	0.785714	0.344086	0.590909	0.636364	0.850575	0.778302	0.705732
