# Supplementary material for: Assessing the quality of medical death certification: a case study of concordance between national statistics and results from a medical record review in a regional hospital in the Philippines
Source: Popul Health Metr. 2018 Dec 29;16:23. doi: 10.1186/s12963-018-0178-0 (PMC6311069; doi:10.1186/s12963-018-0178-0)
Supplement: Supplementary file 5 — Misclassification matrix for adult gold low quality diagnoses. Misclassification table for gold standard 3 and 4 deaths that compares the underlying cause of death assigned by study physicians with the underlying cause of death assigned by the Philippine Statistics Authority. (XLSX 15 kb) [file 12963_2018_178_MOESM5_ESM.xlsx]

## Sheet: confusion_matrix_low
	Medical Record Review
Philippine Statistics Authority		Acute Myocardial Infarction	Breast Cancer	Cirrhosis	Colorectal Cancer	COPD	Diabetes	Diarrhea/Dysentery	Falls	Homicide	Leukemia/Lymphomas	Lung Cancer	Maternal	Other Cancers	Other Cardiovascular Diseases	Other Infectious Diseases	Other Injuries	Other Ncds	Pneumonia	Pulmonary tuberculosis	Renal disease	Road Traffic	Stroke	Total	CSMF	Agreement	% Agreement
	Acute Myocardial Infarction	9	0	0	0	0	0	0	0	0	0	0	0	0	1	0	0	1	0	0	0	0	0	11	0.0438247	9	0.818182
	Breast Cancer	0	0	0	0	0	1	0	0	0	0	0	0	0	0	0	0	0	0	0	0	0	0	1	0.00398406	0	0
	Cirrhosis	0	0	4	0	0	0	0	0	0	0	0	0	0	0	0	0	3	0	0	0	0	0	7	0.0278884	4	0.571429
	Colorectal Cancer	0	0	0	0	0	0	0	0	0	0	0	0	0	0	0	0	1	0	0	0	0	0	1	0.00398406	0	0
	COPD	0	0	0	0	1	0	0	0	0	0	0	0	0	0	1	0	0	0	1	0	0	0	3	0.0119522	1	0.333333
	Diabetes	0	0	0	0	0	10	0	0	0	0	0	0	0	1	2	0	1	1	0	0	0	0	15	0.059761	10	0.666667
	Diarrhea/Dysentery	0	0	0	0	0	0	0	0	0	0	0	0	0	0	0	0	2	0	0	0	0	0	2	0.00796813	0	0
	Falls	0	0	0	0	0	0	0	1	0	0	0	0	0	0	0	0	1	0	0	0	0	0	2	0.00796813	1	0.5
	Homicide	0	0	0	0	0	0	0	0	0	0	0	0	0	0	0	0	0	0	0	0	0	0	0	0	0	0
	Leukemia/Lymphomas	0	0	0	0	0	0	0	0	0	0	0	0	0	0	0	0	0	0	0	0	0	0	0	0	0	0
	Lung Cancer	0	0	0	0	0	0	0	0	0	0	3	0	0	0	0	0	0	0	1	0	0	0	4	0.0159363	3	0.75
	Maternal	0	0	0	0	0	0	0	0	0	0	0	2	0	0	0	0	0	0	0	0	0	0	2	0.00796813	2	1
	Other Cancers	0	0	1	1	0	0	0	0	0	0	0	0	9	0	1	0	0	0	0	0	0	0	12	0.0478088	9	0.75
	Other Cardiovascular Diseases	1	0	0	0	0	1	0	0	0	0	0	0	0	13	0	0	2	0	0	0	0	0	17	0.0677291	13	0.764706
	Other Infectious Diseases	0	0	1	0	0	0	1	0	0	0	0	0	0	1	22	0	5	0	0	1	0	1	32	0.12749	22	0.6875
	Other Injuries	0	0	0	0	0	0	0	0	0	0	0	0	0	0	0	4	0	0	0	0	0	0	4	0.0159363	4	1
	Other NCDS	0	0	1	0	0	1	0	0	0	0	0	0	1	2	7	1	44	1	1	4	0	3	66	0.262948	44	0.666667
	Pneumonia	0	0	0	0	0	1	0	0	0	0	0	0	1	1	2	0	2	5	1	1	0	1	15	0.059761	5	0.333333
	Pulmonary tuberculosis	0	0	0	0	0	0	0	0	0	0	0	0	0	0	2	0	3	1	14	0	0	0	20	0.0796813	14	0.7
	Renal disease	0	0	0	0	0	1	0	0	0	0	0	0	0	0	3	0	5	1	0	8	0	0	18	0.0717131	8	0.444444
	Road Traffic	0	0	0	0	0	0	0	0	0	0	0	0	0	0	0	0	0	0	0	0	0	0	0	0	0	0
	Stroke	0	0	0	0	0	0	0	0	0	0	0	0	0	1	1	0	2	2	0	0	0	13	19	0.0756972	13	0.684211
	Total	10	0	7	1	1	15	1	1	0	0	3	2	11	20	41	5	72	11	18	14	0	18	251	1	162	0.645418
	CSMF	0.0398406	0	0.0278884	0.00398406	0.00398406	0.059761	0.00398406	0.00398406	0	0	0.0119522	0.00796813	0.0438247	0.0796813	0.163347	0.0199203	0.286853	0.0438247	0.0717131	0.0557769	0	0.0717131	1
	Agreement	9	0	4	0	1	10	0	1	0	0	3	2	9	13	22	4	44	5	14	8	0	13	162
	% Agreement	0.9	0	0.571429	0	1	0.666667	0	1	0	0	1	1	0.818182	0.65	0.536585	0.8	0.611111	0.454545	0.777778	0	0	0.722222	0.645418
